# Supplementary material for: Resistance components in organic electrolytes containing Fe2+/Fe3+ for liquid thermoelectric conversion devices
Source: Royal Society of Chemistry journal article supplement (doi:10.1039/d3nj03721e), 2023-01-01
Supplement: d3nj03721e1.pdf [file d3nj03721e1.pdf]

Electronic Supplementary Information

**Resistance components in organic electrolytes containing Fe<sup>2+</sup>/Fe<sup>3+</sup>  
for liquid thermoelectric conversion device**

**Yunika Nomura<sup>a</sup>, Dai Inoue<sup>a</sup>, and Yutaka Moritomo<sup>a,b,c</sup>**

<sup>a</sup>Graduate School of Pure and Applied Sciences, University of Tsukuba, Tsukuba 305-8571,  
Japan

<sup>b</sup>Faculty of Pure and Applied Sciences, University of Tsukuba, Tsukuba 305-8571, Japan

<sup>c</sup>Tsukuba Research Center for Energy Materials Science (TREMS), University of Tsukuba,  
Tsukuba 305-8571, Japan

Contact information:

Yutaka Moritomo

Graduate School of Pure and Applied Sciences

Faculty of Pure and Applied Sciences, and

Tsukuba Research Center for Energy Materials Science (TREMS)

Univ. of Tsukuba, Tennodai 1-1-1, Tsukuba 305-8571, Japan

Tel & Fax +81-29-853-4337

e-mail: moritomo.yutaka.gf@u.tsukuba.ac.jp

---

| solvent | $R$ ( $\Omega$ ) | $R_s$ ( $\Omega$ ) | $R_{ct}$ ( $\Omega$ ) | $R_{dif}$ ( $\Omega$ ) |
|---------|------------------|--------------------|-----------------------|------------------------|
| PC      | 637              | 396                | 17                    | 224                    |
| DMSO    | 389              | 265                | 11                    | 113                    |
| AN      | 241              | 117                | 20                    | 104                    |
| acetone | 303              | 185                | 18                    | 100                    |
| NMP     | 544              | 389                | 12                    | 143                    |
| DMF     | 258              | 172                | 7                     | 79                     |

Table S1. Total resistance  $R$  solution resistance  $R_s$ , charge-transfer resistance  $R_{ct}$ , and diffusion resistance  $R_{dif}$  of LTE containing 0.1 M  $\text{Fe}(\text{ClO}_4)_2/\text{Fe}(\text{ClO}_4)_3$ . The electrodes were 220 mm graphite sheet (PREMA-FOIL, TOYO TANSO), whose distance and area are 1.0 cm and 0.42 cm<sup>2</sup>, respectively. The temperature of the cold and hot electrodes were 298 K and 328 K, respectively. PC, DMSO, AN, NMP, and DMF represent propylene carbonate, dimethyl sulfoxide, acetonitrile, N-methylpyrrolidone, and N,N-dimethylformamide, respectively.  $R_s$  and  $R_{ct}$  were evaluated by EIS analysis.  $R_{dif}$  was evaluated by  $R - R_s - R_{ct}$ .

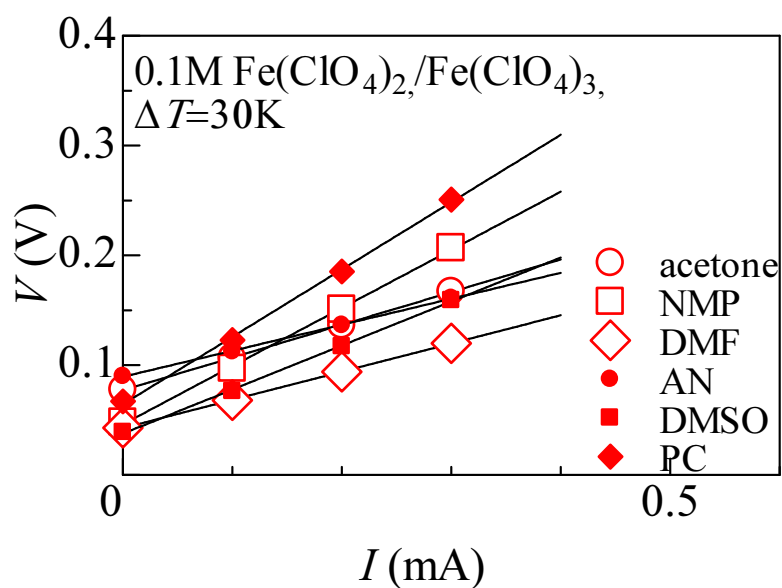

Fig. S1: Voltage  $V$  against current  $I$  of LTE with organic solutions containing 0.1 M  $\text{Fe}(\text{ClO}_4)_2/\text{Fe}(\text{ClO}_4)_3$ . The electrodes were 220  $\mu\text{m}$  graphite sheet (PREMA-FOIL, TOYO TANSO), whose distance and area are 1.0 cm and 0.42  $\text{cm}^2$ , respectively. The temperature of the cold and hot electrodes were 298 K and 328 K, respectively. Note that finite electromotive force is observed at  $I=0$  mA. The straight lines are the results of least-squares fits. The slope corresponds to the total resistance  $R$ .

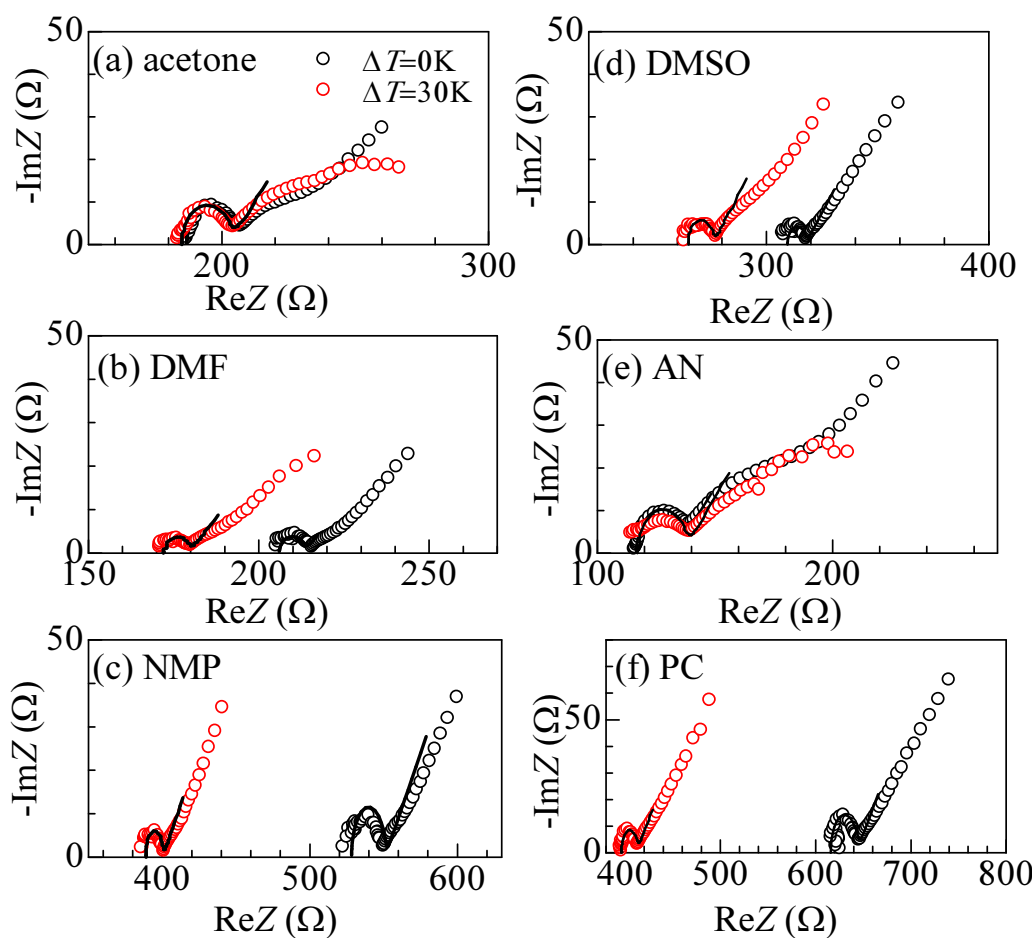

Fig. S2: Electrochemical impedance spectroscopy (EIS) data of LTE with organic solutions containing 0.1 M  $\text{Fe}(\text{ClO}_4)_2/\text{Fe}(\text{ClO}_4)_3$ : (a) acetone, (b) DMF, (c) NMP, (d) DMSO, (e) AN, and (f) PC. The electrodes were 220  $\mu\text{m}$  graphite sheet (PREMA-FOIL, TOYO TANSO), whose distance and area are 1.0 cm and 0.42  $\text{cm}^2$ , respectively. The temperature of the cold electrode was 298 K. Red and black circles represent data at  $\Delta T = 0$  and 30 K, respectively. Solid curves are results of least-squares fits with a Randles equivalent circuit which consists of  $R_s$ ,  $R_{ct}$ ,  $C_d$ , and  $Z_{\omega}$ .

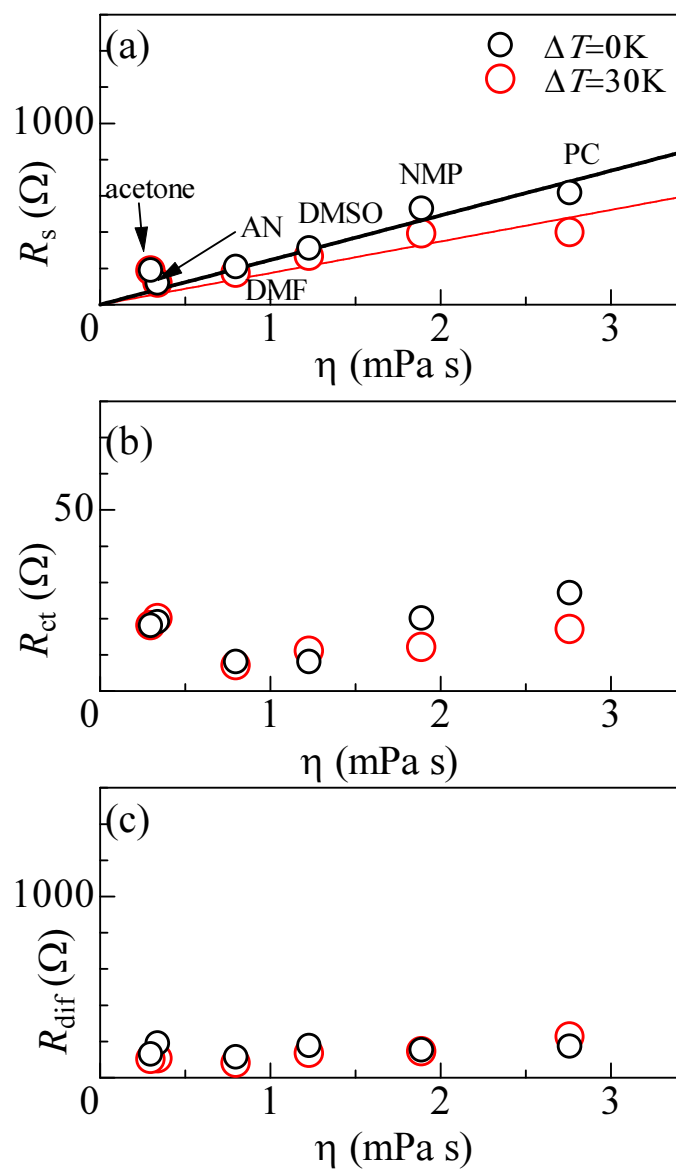

Fig. S3: Solvent dependence of (a)  $R_s$ , (b)  $R_{ct}$ , and (c)  $R_{dif}$  against viscosity  $\eta$  of LTE containing 0.1 M  $\text{Fe}(\text{ClO}_4)_2/\text{Fe}(\text{ClO}_4)_3$ . The electrodes were 220 mm graphite sheet (PREMA-FOIL, TOYO TANSO), whose distance and area are 1.0 cm and  $0.42 \text{ cm}^2$ , respectively. The temperature of the cold electrode was 298 K. Red and black circles represent data at  $\Delta T = 0$  and 30 K, respectively. Straight lines in (a) are results of least-squares fits.
